## CORRECTION

# Correction: Association between cancer stigma and cervical cancer screening uptake among women of Dhulikhel and Banepa, Nepal

**Bandana Paneru, Aeron Karmacharya, Alina Bharati, Soniya Makaju, Bikram Adhikari, Dikshya Kafle, Sunila Shakya, Spiegelman Donna, Sangini Seth, Anne Stangl, Aamod Dhoj Shrestha, Archana Shrestha**

The eight author's full name is incorrect. The correct full name is: Spiegelman Donna.

## Reference

1. Paneru B, Karmacharya A, Bharati A, Makaju S, Adhikari B, Kafle D, et al. (2023) Association between cancer stigma and cervical cancer screening uptake among women of Dhulikhel and Banepa, Nepal. PLoS ONE 18(5): e0285771. <https://doi.org/10.1371/journal.pone.0285771> PMID: 37200234

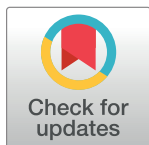

## OPEN ACCESS

**Citation:** Paneru B, Karmacharya A, Bharati A, Makaju S, Adhikari B, Kafle D, et al. (2025) Correction: Association between cancer stigma and cervical cancer screening uptake among women of Dhulikhel and Banepa, Nepal. PLoS ONE 20(1): e0318367. <https://doi.org/10.1371/journal.pone.0318367>

**Published:** January 24, 2025

**Copyright:** © 2025 Paneru et al. This is an open access article distributed under the terms of the [Creative Commons Attribution License](https://creativecommons.org/licenses/by/4.0/), which permits unrestricted use, distribution, and reproduction in any medium, provided the original author and source are credited.
